# Supplementary material
Source: publisher figshare collection journal article supplement (https://karger.figshare.com/articles/dataset/_/5127202)
Supplement: Supplementary file 1 [file 1]

**Supplementary figure 1.** Mice received at day 0, 7, 14 an i.p. injection with Bet v 1 (10 µg)/alum (1 mg) or BPE (8.2 µg BP containing 1 µg Bet v 1)/alum(1 mg). Mice were challenged at day 21, 22, 23 with 100 µg BP intranasally. AHR was determined at day 24 and mice were sacrificed at day 25 to analyze the immunological parameters.

**Supplementary figure 2.** Eotaxin-2 levels were determined in individual BALF samples of mice with a BP induced eosinophilic airway inflammation (A), or in BALF of mice which received 2x BP SCIT or 8x BP SCIT (left panel) or in pooled BALF samples of 2-3 animals after treatment with 4, 6 or 8x BP SCIT (right panel). The pooled samples were obtained from two independent experiments and were analysed together to achieve a sufficient number of data points for statistical analysis (B). BP SCIT treated mice were rechallenged with 3 BPE aerosols and 48 hours later the airways were lavaged to determine Eotaxin-2 levels.*P<0.05, **P<0.01, ***P<0.001 vs mice receiving corresponding number of PBS injections instead of BP SCIT.
